# Supplementary material
Source: PubMed Central journal article supplement (PMC9346439)
Supplement: sj-pdf-2-jic-10.1177_08850666211032175.pdf [file sj-pdf-2-jic-10.1177_08850666211032175.pdf]

Supplement 2. Time to corticosteroid administration.

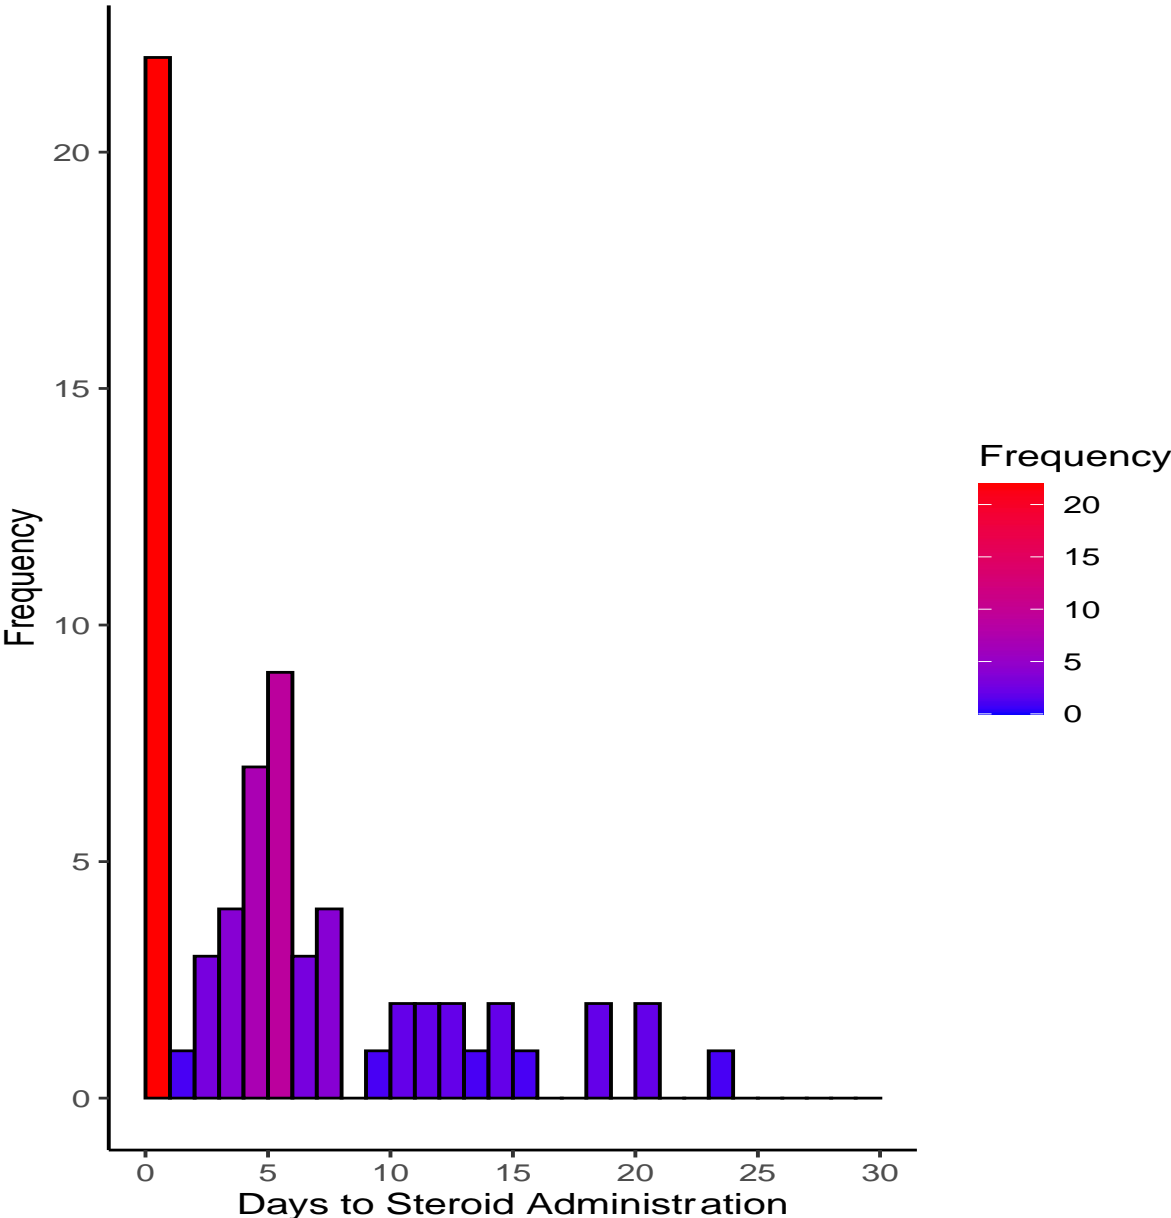

Supplement 2. Histogram depicting time to first corticosteroid dose in days.
